# Supplementary material
Source: PubMed Central journal article supplement (PMC4232179)

**Fig. 1S**

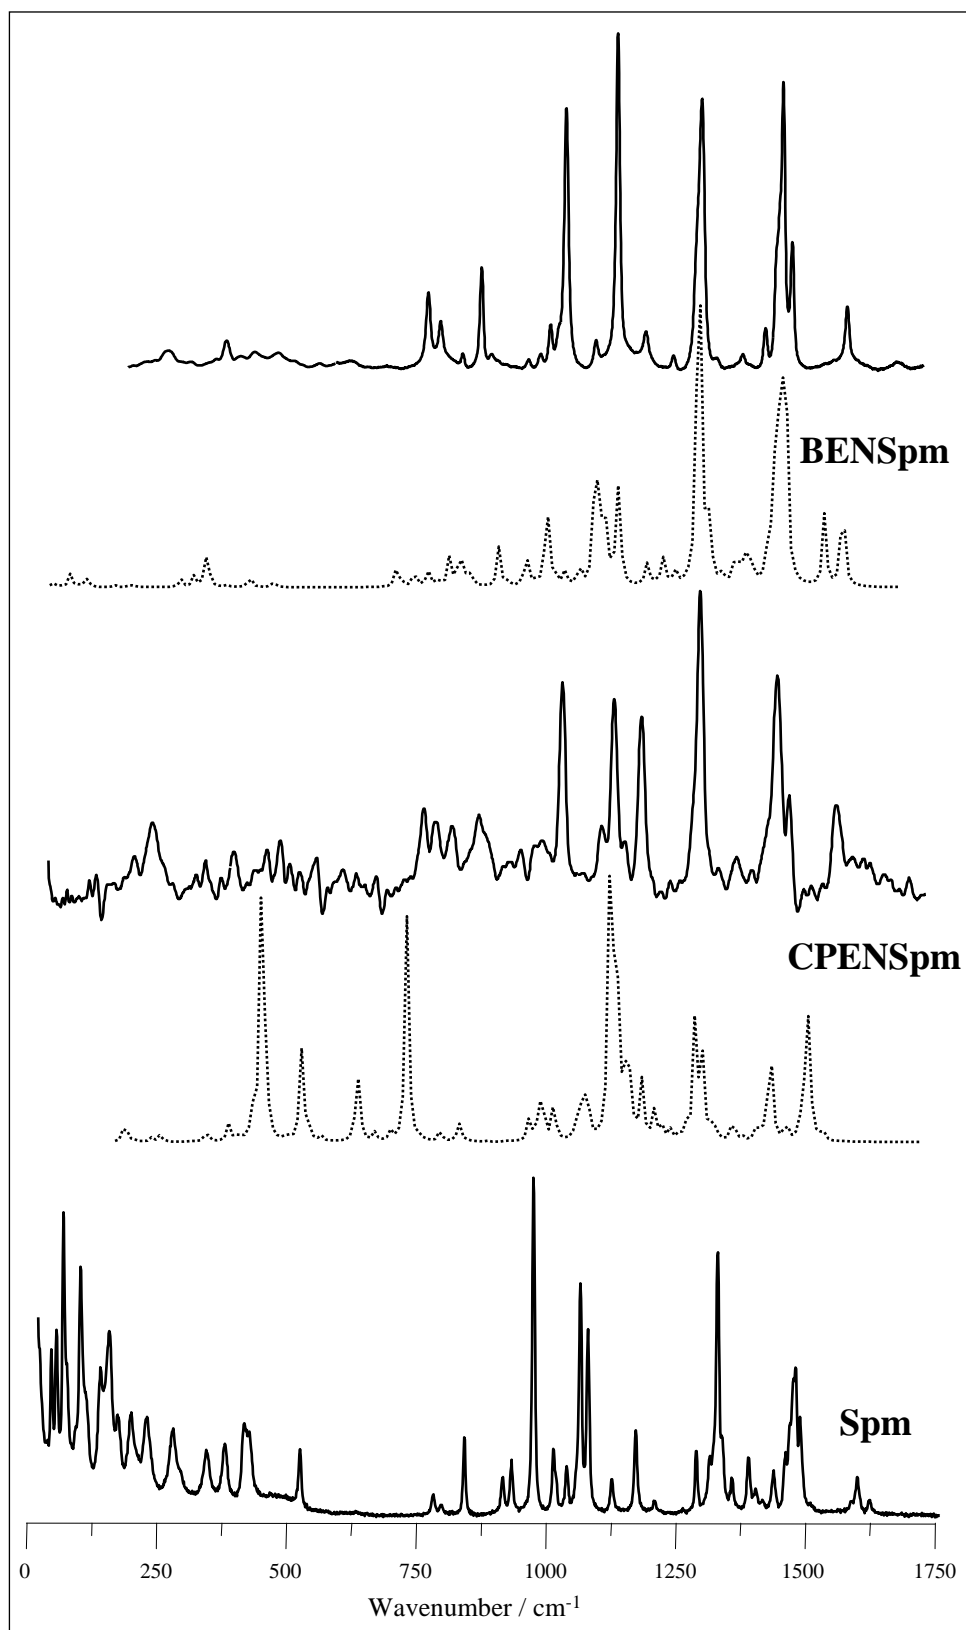

**Fig. 2S(a)**

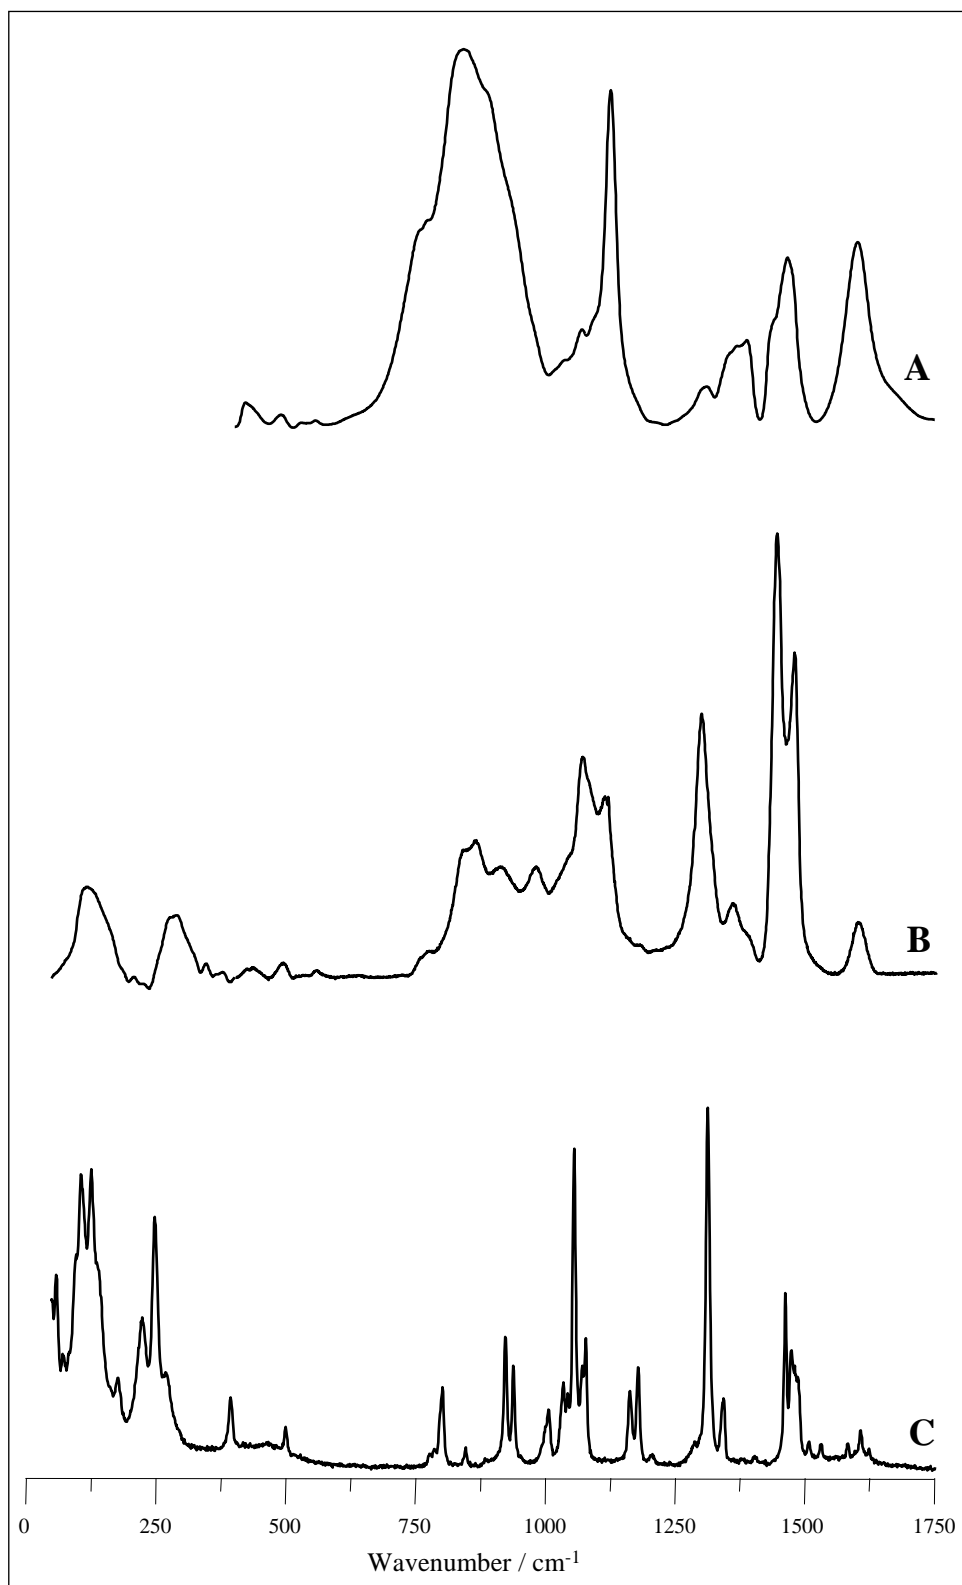

**Fig. 2S(b)**

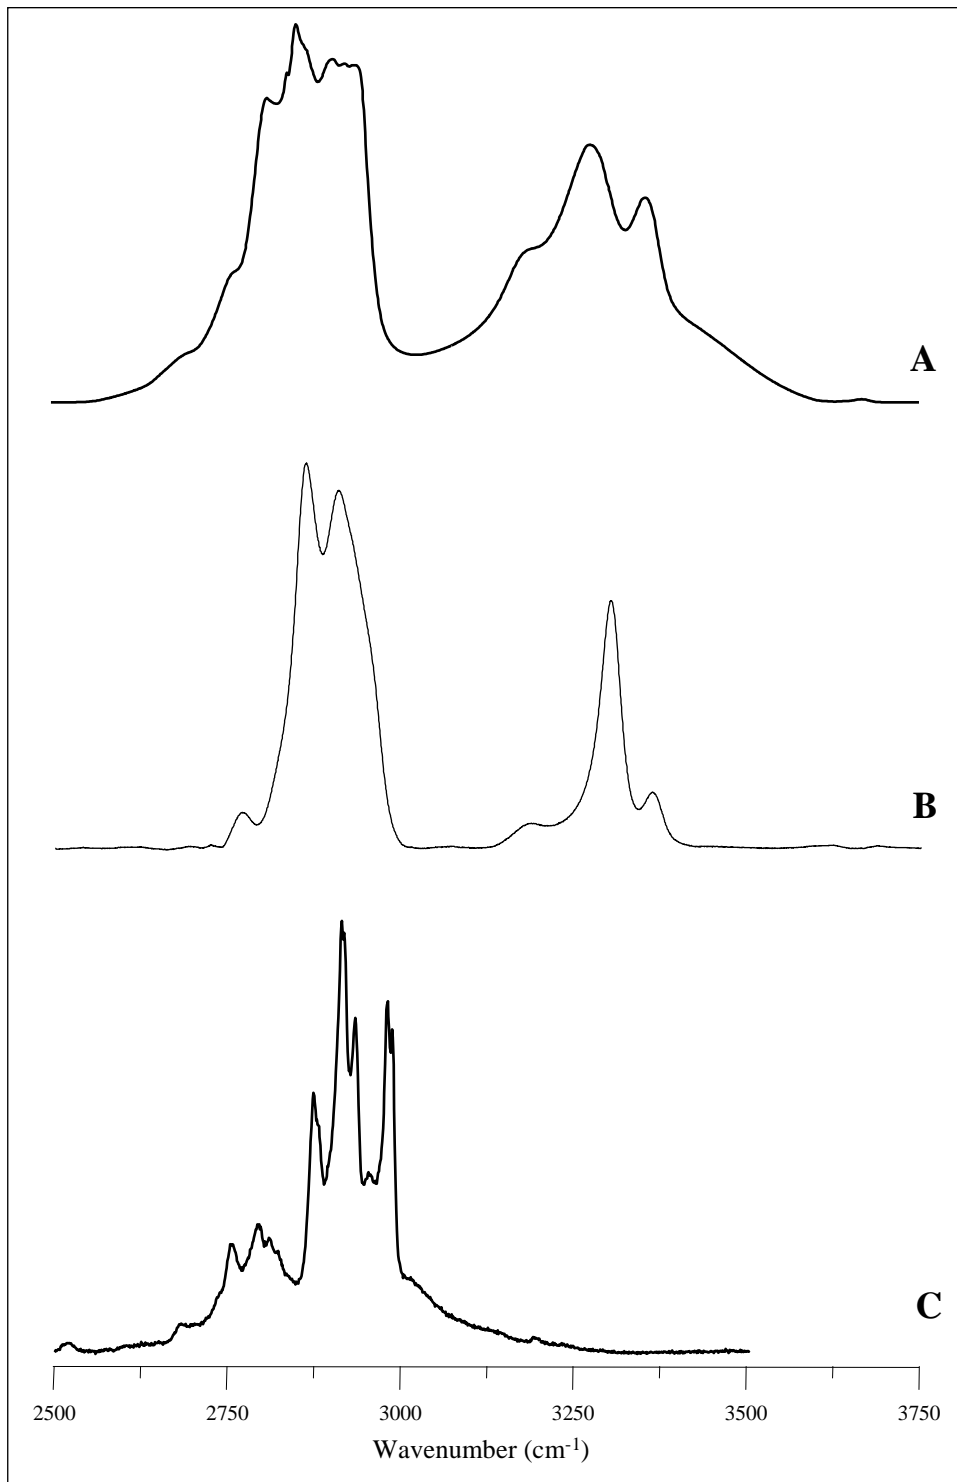

**Fig. 3S(a)**

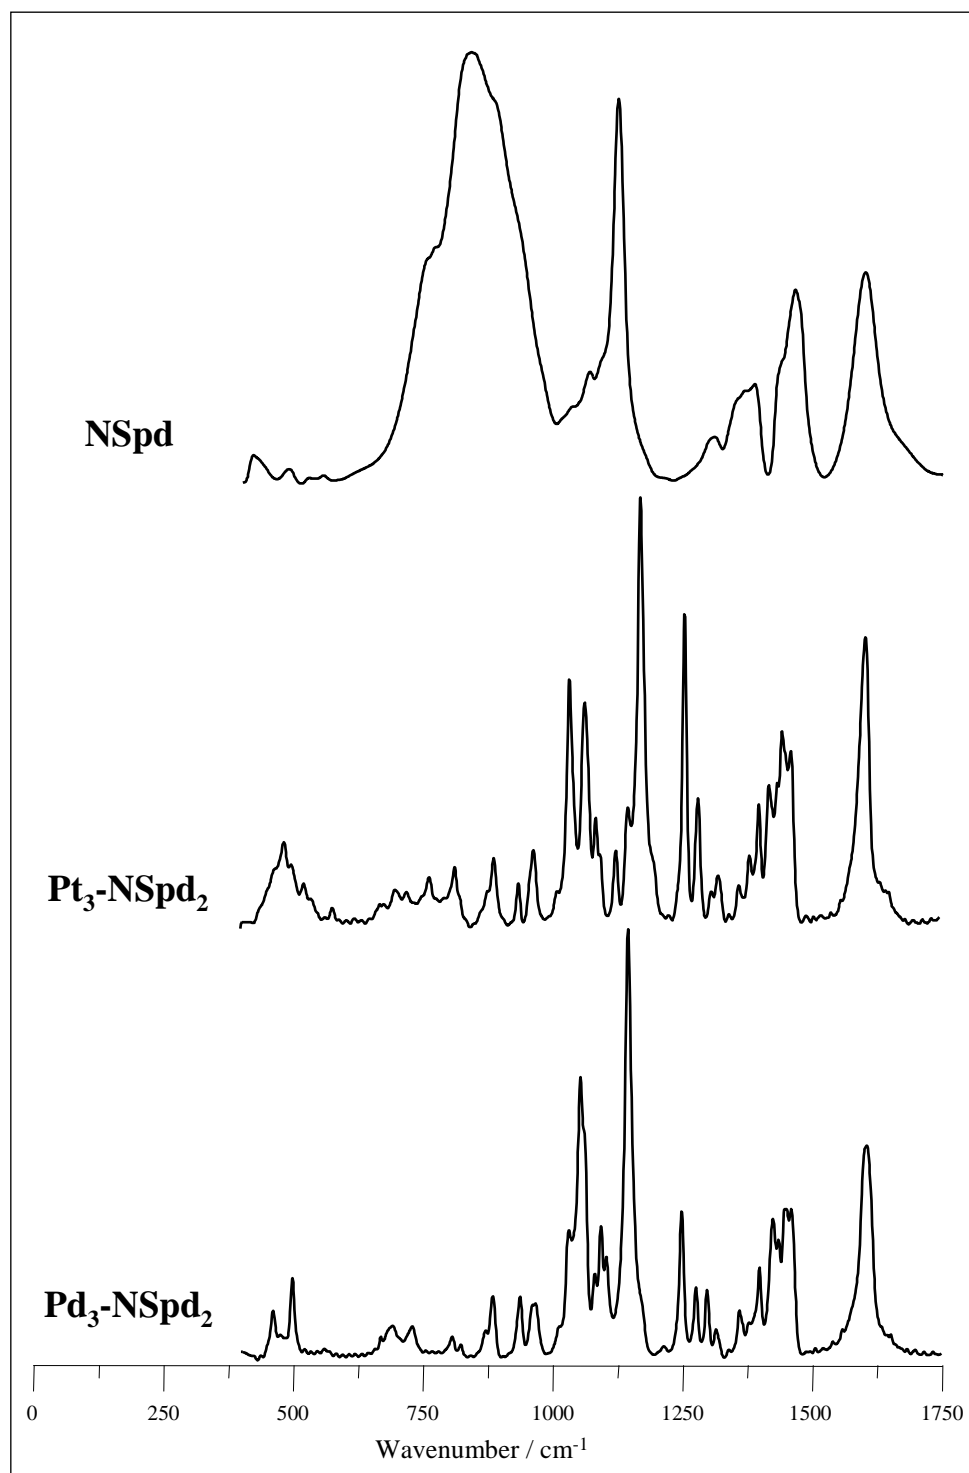

**Fig. 3S(b)**

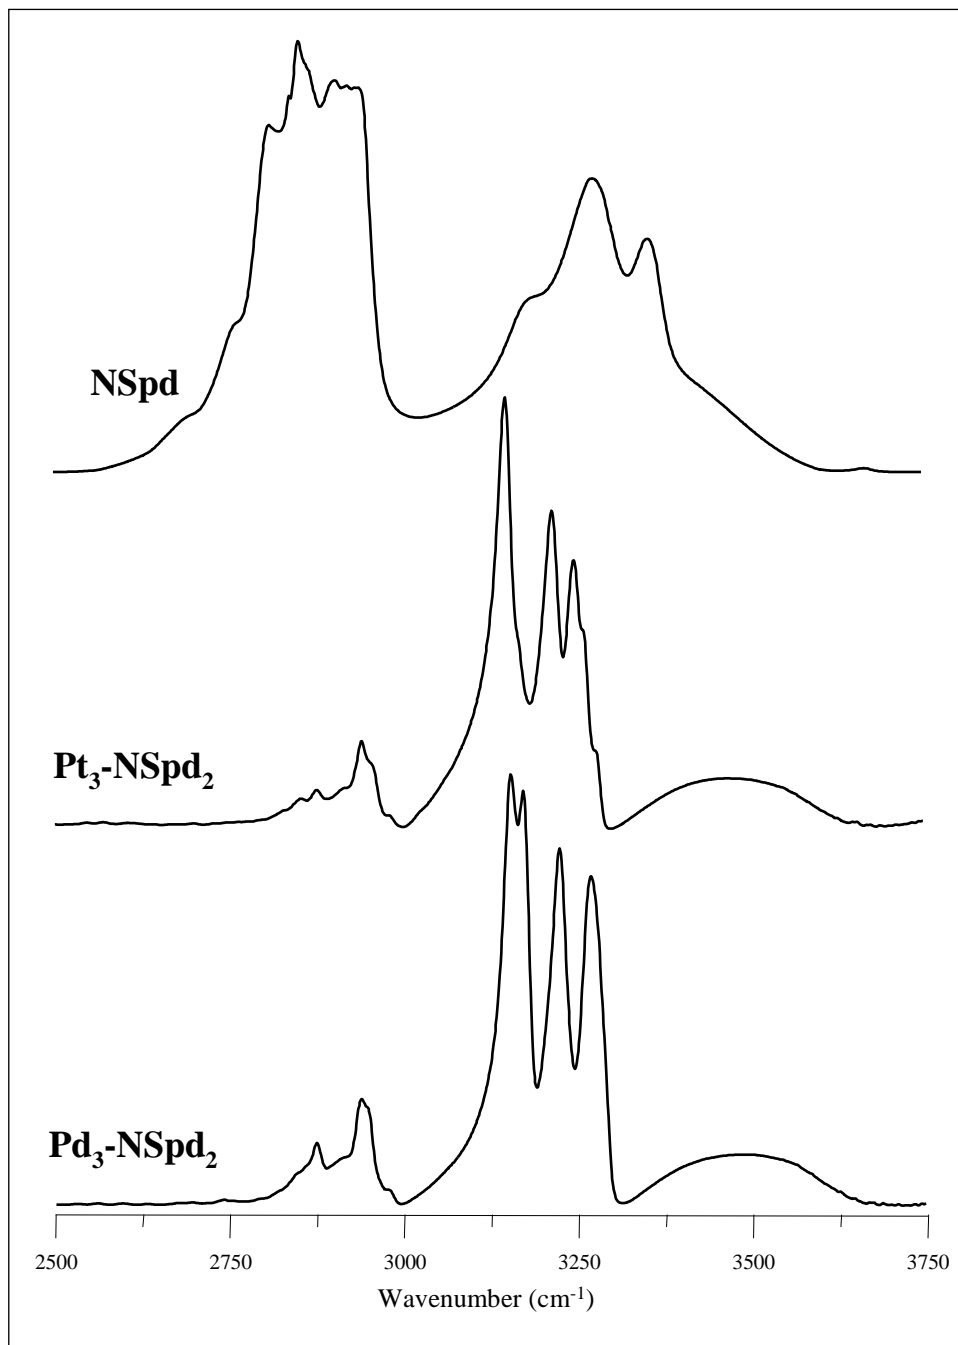

**Fig. 4S(a)**

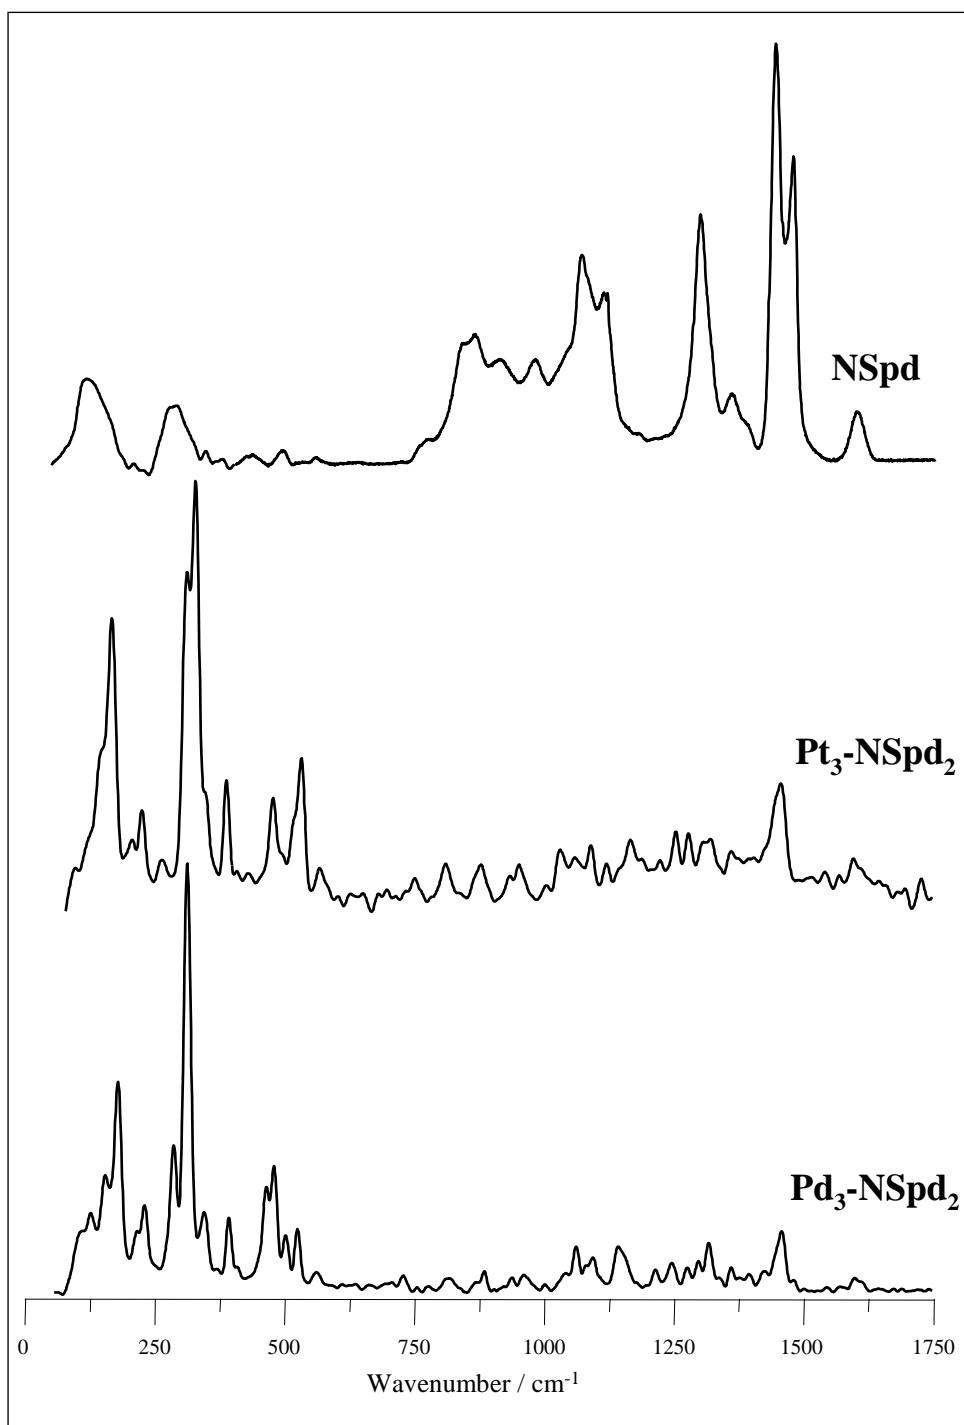

**Fig. 4S(b)**

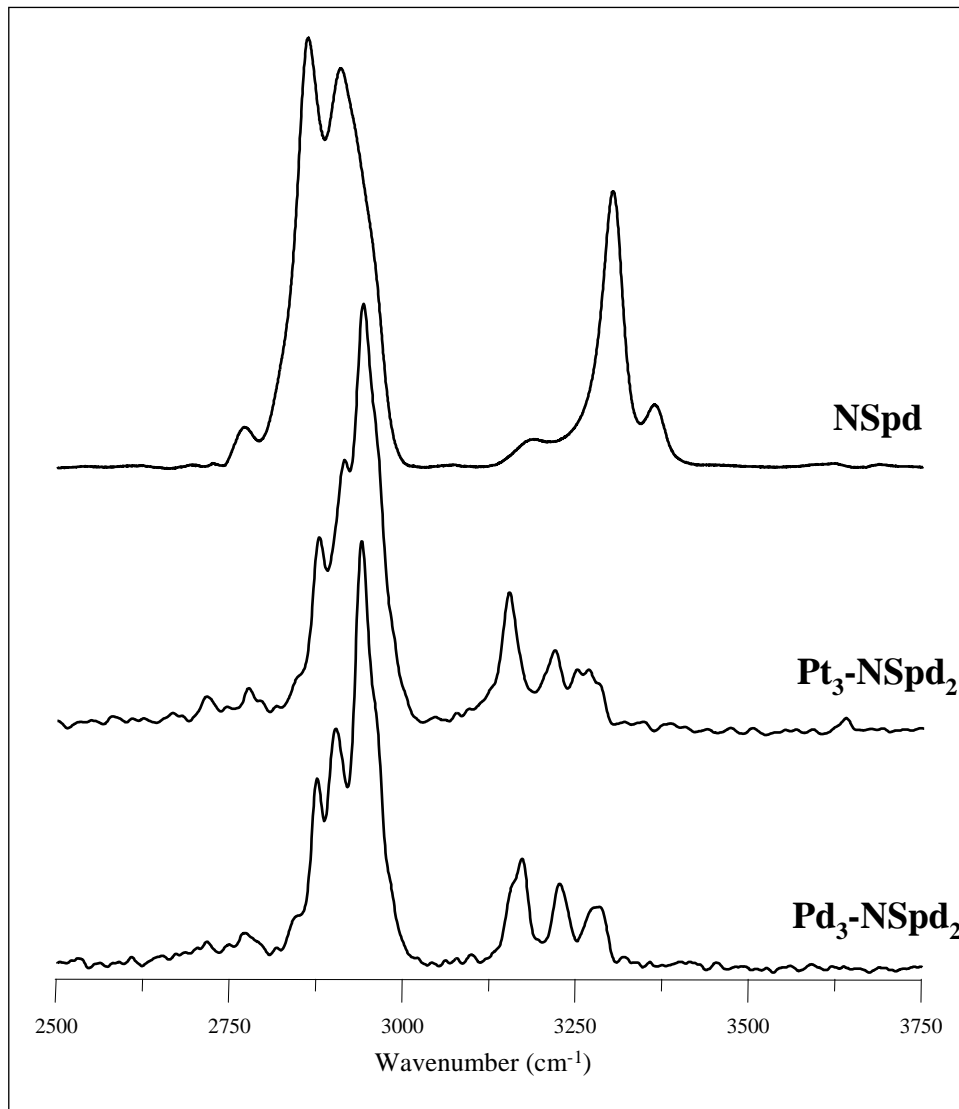

Supplement: NIHMS640689-supplement-Supplementary_Material.pdf [file NIHMS640689-supplement-Supplementary_Material.pdf]
